# Supplementary material for: Causal associations between chronic obstructive pulmonary disease and cardiovascular diseases: a Mendelian randomization study
Source: Research Square preprint supplement (doi:10.21203/rs.3.rs-3871875/v1), 2024-01-19
Supplement: Supplementary file 2 [file ddcf62f5b2d6fec6c3870abe.docx]

Table S1. Heterogeneity testing using the Cochran’s Q statistic

| Outcomes | Methods | Q | df | *P* value |
| --- | --- | --- | --- | --- |
| HF | MR Egger | 58.780610 | 40 | 0.027973 |
|  | IVW | 58.830144 | 41 | 0.035084 |
| CHD | MR Egger | 62.07231 | 49 | 0.099474 |
|  | IVW | 62.31008 | 50 | 0.113551 |
| EH | MR Egger | 51.7281 | 37 | 0.054605 |
|  | IVW | 52.1125 | 38 | 0.063318 |
| AF | MR Egger | 48.28414 | 52 | 0.620808 |
|  | IVW | 48.8108 | 53 | 0.637914 |
| Stroke | MR Egger | 44.33044 | 51 | 0.73394 |
|  | IVW | 46.50171 | 52 | 0.689133 |
